# Supplementary material for: Electrochemically tuned cobalt hydroxide carbonate with abundant grain boundaries for highly efficient electro-oxidation of hydrazine
Source: Royal Society of Chemistry journal article supplement (doi:10.1039/c7qm00511c), 2017-12-26
Supplement: c7qm00511c1.pdf [file c7qm00511c1.pdf]

## **Electrochemically Tuned Cobalt Hydroxide Carbonate with abundant Grain Boundaries for Highly Efficient Electro-Oxidation of Hydrazine**

Xiaodong Yan,<sup>a,1</sup> Yuan Liu,<sup>b,1</sup> Jinle Lan,<sup>c</sup> Yunhua Yu,<sup>c</sup> James Murowchick,<sup>d</sup> Xiaoping Yang,<sup>c,\*\*</sup>  
Zhonghua Peng,<sup>a,\*</sup>

<sup>a</sup> Department of Chemistry, University of Missouri – Kansas City, Kansas City, Missouri 64110,  
United States

<sup>b</sup> State Key Lab of New Ceramics and Fine Processing, School of Materials Science and  
Engineering, Tsinghua University, Beijing 100084, China

<sup>c</sup> State Key Laboratory of Organic-Inorganic Composites, Beijing University of Chemical  
Technology, Beijing 100029, China

<sup>d</sup> Department of Geosciences, University of Missouri – Kansas City, Kansas City, Missouri  
64110, United States

\* Corresponding author. Department of Chemistry, University of Missouri – Kansas City,  
Kansas City, Missouri 64110, United States

\*\* Corresponding author. State Key Laboratory of Organic-Inorganic Composites, Beijing  
University of Chemical Technology, Beijing 100029, China

E-mail addresses: [PengZ@umkc.edu](mailto:PengZ@umkc.edu) (Z. Peng); [yangxp@mail.buct.edu.cn](mailto:yangxp@mail.buct.edu.cn) (X. Yang)

<sup>1</sup> These authors contributed equally.

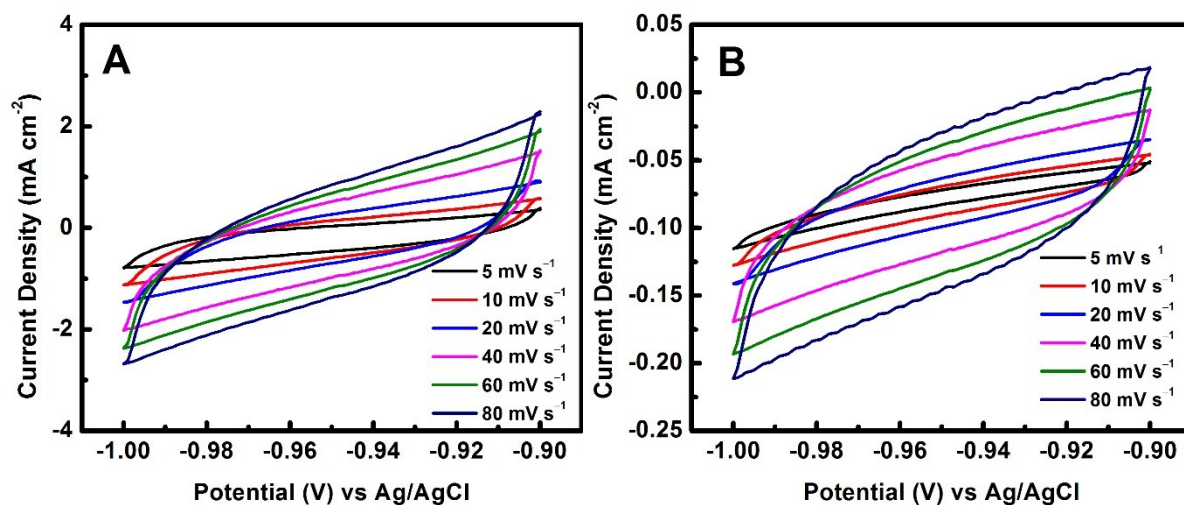

Fig. S1 Voltammograms of the (A) ECT-Co(OH)<sub>x</sub>(CO<sub>3</sub>)<sub>0.5(2-x)</sub> and (B) pristine Co(OH)<sub>x</sub>(CO<sub>3</sub>)<sub>0.5(2-x)</sub> electrodes collected at varied scan rates of 5, 10, 20, 40, 60, and 80 mV s<sup>-1</sup> in 1.0 M KOH.

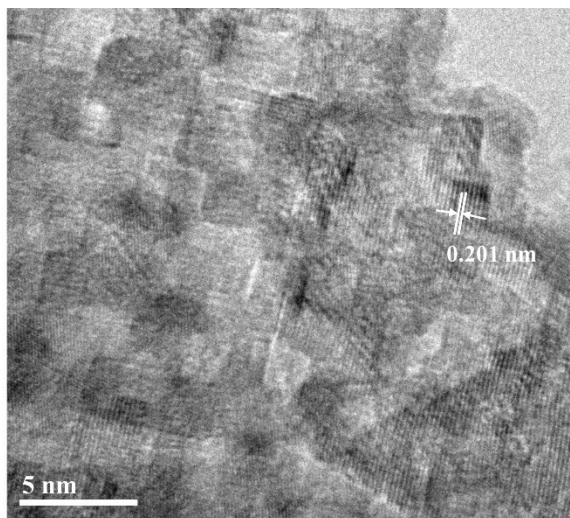

Fig. S2 HTREM image of ECT-  $\text{Co(OH)}_x(\text{CO}_3)_{0.5(2-x)}$ .

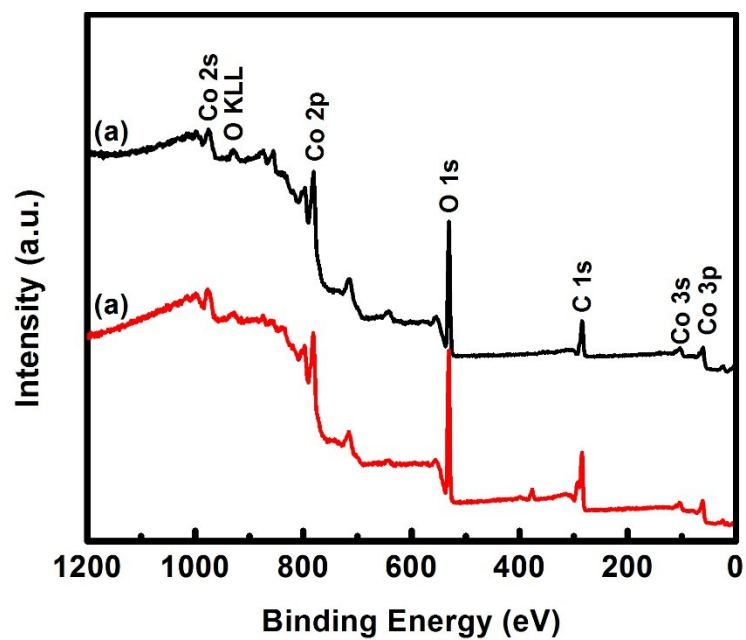

Fig. S3 XPS survey spectra of the  $\text{Co(OH)}_x(\text{CO}_3)_{0.5(2-x)}$  (a) and ECT- $\text{Co(OH)}_x(\text{CO}_3)_{0.5(2-x)}$  (b).

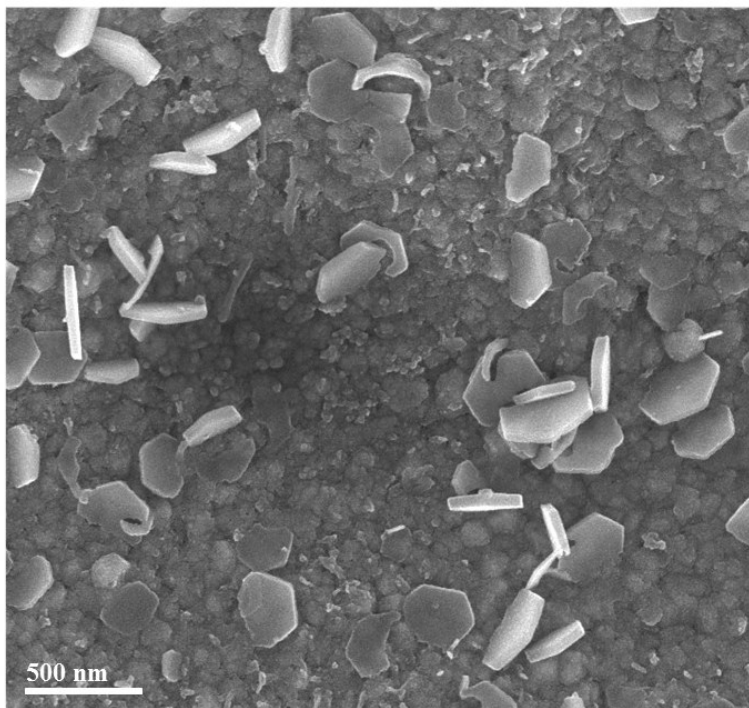

Fig. S4 SEM image of the ECT- $\text{Co(OH)}_x(\text{CO}_3)_{0.5(2-x)}$  electrode after 350 cycles.

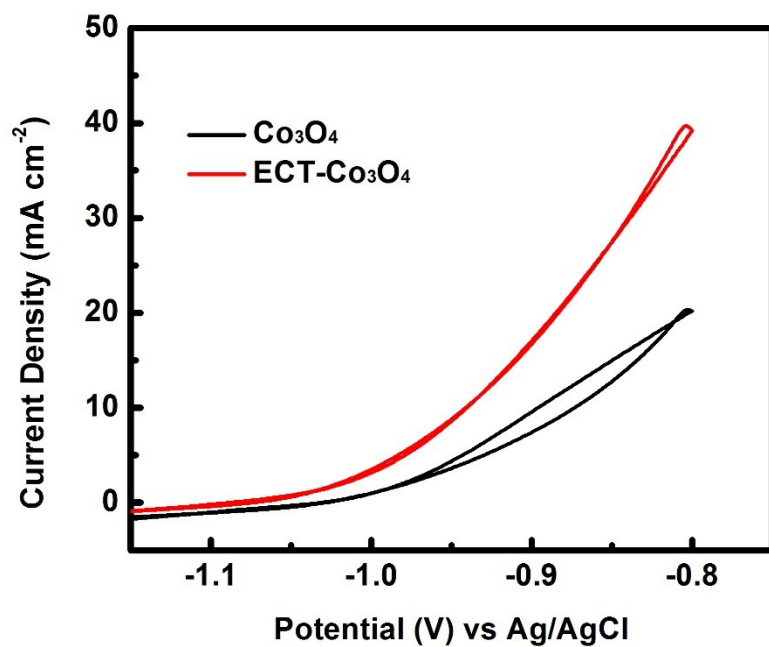

Fig. S5 Voltammograms of the  $\text{Co}_3\text{O}_4$  and ECT- $\text{Co}_3\text{O}_4$  electrodes at a scan rate of  $20 \text{ mV s}^{-1}$  in  $0.5 \text{ M N}_2\text{H}_4$  aqueous solution with  $1.0 \text{ M KOH}$ .

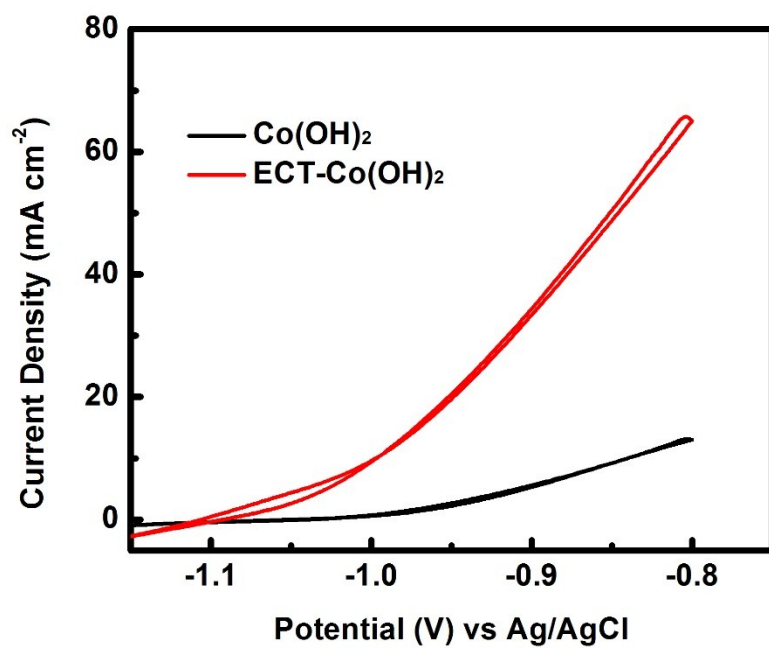

Fig. S6 Voltammograms of the Co(OH)<sub>2</sub> and ECT-Co(OH)<sub>2</sub> electrodes at a scan rate of 20 mV s<sup>-1</sup> in 0.5 M N<sub>2</sub>H<sub>4</sub> aqueous solution with 1.0 M KOH.

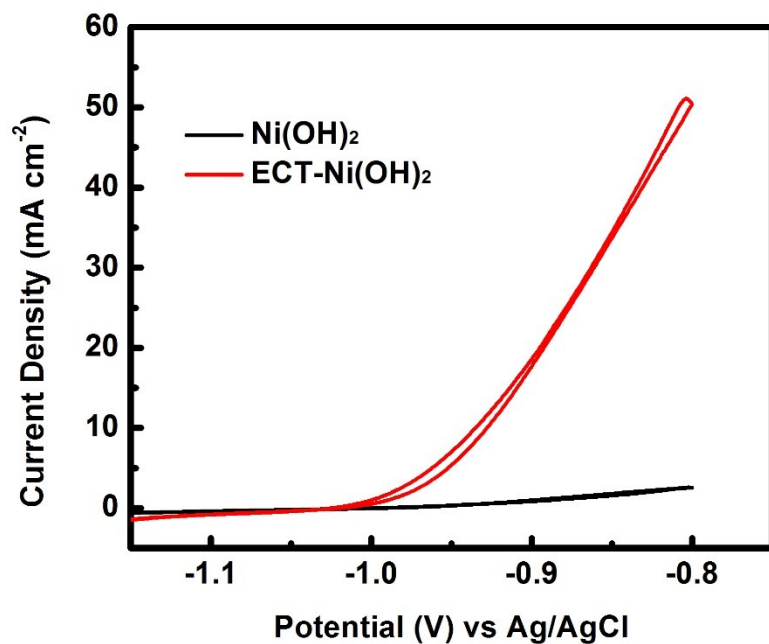

Fig. S7 Voltammograms of the Ni(OH)<sub>2</sub> and ECT-Ni(OH)<sub>2</sub> electrodes at a scan rate of 20 mV s<sup>-1</sup> in 0.5 M N<sub>2</sub>H<sub>4</sub> aqueous solution with 1.0 M KOH.
